## 30 1. INTRODUCTION

31 In the last decades, maize (*Zea mays* L.) has reached the level of the world's largest crop, being the  
32 only one to produce more than 1 billion tons per year (Contini et al., 2019), which makes it a crop of high economic  
33 importance, due also to its multiple uses, such as human and animal nutrition, ethanol fuel production and in the  
34 pharmaceutical industry. Although maize yield has been growing, the development of new cultivars adapted to  
35 the specific edaphoclimatic conditions of different regions at different planting times is still necessary (Andrade  
36 et al., 2016).

37 As an allogamous species of great agronomic interest, maize has already been extensively studied by  
38 breeding programs, and the increase in productivity in this species is mainly dependent on the development of  
39 single- cross cultivars, also known as hybrids, where the hybridization is used to explore the expression of  
40 heterosis, first described by Shull (1908), which is quite expressive and well known in maize. To released new  
41 cultivars capable of high yields and great performance of other agronomical characteristics, maize breeding  
42 programs develop thousands of hybrids each year that need to be evaluated in field experiments; however,  
43 resources are limited, and evaluations are expensive and labor-intensive. The time, area, labor, and budget required  
44 to evaluate all those materials in all the desired locations and for all the traits of interest each year are very high  
45 and, in most cases, unfeasible. Therefore, technologies, such as genomic prediction (GP), capable of predicting  
46 the performance of those materials early, with no need to wait until the end of the crop cycle to discard unwanted  
47 materials, are of great interest to the sector (Schrag et al., 2009; Werner et al., 2020).

48 GP emerged with the promise of increasing genetic gain per unit of time and reducing costs (Meuwissen  
49 et al., 2001), and has been widely studied for different crops like maize, wheat, rice, coffee, and brachiaria (Cossa  
50 et al., 2017; Carvalho et al., 2020; Matias et al., 2019), as well as for livestock and forest trees. Genomic selection  
51 (GS) has been used for many purposes, for example, to predict the performance of lines and double haploids  
52 during the initial stages of development (Krchov & Bernardo, 2015; Werner et al., 2020), including the quality  
53 (Ibba et al., 2020; Lado et al., 2018), resistance to diseases (Rutkoski et al., 2012) and performance of single-  
54 crosses (Bandeira e Sousa et al., 2017; Lyra et al., 2017; Alves et al., 2019). Several groups have shown that there  
55 are advantages with the inclusion of multiple traits (MT) in GP, since they explore the correlation between traits  
56 and their heritability in the prediction process, surpassing single-trait models' predictive ability (Jia & Jannink,  
57 2012; Lado et al., 2018; Schulthess et al., 2018). Moreover, the use of multi-environment models (MET) seems  
58 unquestionable (Guo et al., 2020; Oakey et al., 2016). Consequently, the combination of both, i.e., multi-trait  
59 multi-environment models (MTMET), may improve the accuracy and save labor costs (de Oliveira et al., 2020;  
60 Montesinos-López et al., 2016, 2019; Wang et al., 2018).

61 However, regardless of the GP method, the training set population (TRN) needs to be genotyped and  
62 high-quality phenotyped, while the testing set population (TST) only needs to be genotyped. The establishment  
63 of the TRN, which should be representative in terms of size, diversity, and the relationship of the individuals to  
64 be predicted, is the key to success in GS (Jannink et al., 2010; Akdemir et al., 2015; Cossa et al., 2017; Varshney,  
65 2017; Ibba et al., 2020). For that, the main objectives are to minimize costs associated with phenotyping by  
66 selecting smaller training populations, and maximize the predictive ability for the individuals of the TST through  
67 efficient resource allocation (Isidro et al., 2015; Lado et al., 2018; Pinho Morais et al., 2020; Riedelsheimer &  
68 Melchinger, 2013; Technow et al., 2014). Additionally, there is a lack of knowledge on how to distribute

69 genotypes optimally in multi-environment trials in order to achieve the best balance between the number of  
70 genotypes tested in the field and the predictive capacity of GP models, and maximize the selection gain with fixed  
71 area and budget resources (Jarquin et al., 2020). Furthermore, in MTMET, we could also ask: which traits should  
72 be evaluated in each genotype:trial combination?

73 Hence, the strategy is to design optimized populations for GP, which allows keeping the accuracy of  
74 prediction at satisfactory levels using a training population that is smaller, but representative in terms of  
75 information (Fritsche-Neto et al., 2018). In this context, many studies have been carried out aiming to establishing  
76 the balance between investment and efficiency through different methods, experiment design, statistical analysis,  
77 and TRN composition. For instance, the genetic algorithm to design training populations developed by Akdemir  
78 (2017) was tested by Pinho Morais et al. (2020) for several population sizes. The responses were compared with  
79 randomly selected populations, noting that optimizing TRN can be effective to obtain satisfactory accuracies.  
80 Using MT models, Lado et al. (2018) tested other resource allocation strategies by comparing the PA with  
81 different levels of availability of phenotypic information for the target trait (expensive and labor-intensive). For  
82 that, they decreased the TRN sizes from 80 to 10%, then included the phenotypic data of all individuals for  
83 correlated traits (less laborious and less costly), and finally, considered balanced and unbalanced scenarios. The  
84 results showed no loss in PA when reducing TRN for a target trait up to 30% but using full information of  
85 correlated traits; additionally, the unbalanced phenotyping approach for correlated traits performed better than the  
86 balanced one for the same purpose of reducing TRN. Another strategy was proposed by Costa-Neto et al. (2021a),  
87 who investigated the inclusion of dominance effects and envirotyping data into a single-trait MET scenario. The  
88 authors found that, especially for traits with low heritability and highly influenced by the environment, the  
89 environmental covariables (EC) can increase PA for new environments or newly developed hybrids by tracking  
90 variation sources, environment resources, and reducing the error variance.

91 As described above, the use of accurate genetic algorithms for optimizing training populations can help  
92 to reduce the number of genotypes that compose the TRN, as well as reduce costs and field labor, while  
93 maintaining good values of predictive accuracy (Akdemir, 2017; Akdemir et al., 2015; Misztal et al., 2014;  
94 Misztal, 2016). Additionally, the collection and processing of environmental data can help in the optimization  
95 process. Instead of using a simple incidence matrix of environments to model the  $G \times E$  interaction, processed  
96 environmental data better describe specific relationships between environments and crop phenology, called  
97 envirotyping. Through envirotyping, it is possible to describe the quality of an environment and estimate the  
98 resources available to satisfy the crop needs. When it comes to multi-environment trials (MET), environmental  
99 quality ends up as a global average of the entire experimental network. With the aid of some tools, such as the  
100 EnvRtype R package of Costa-Neto et al. (2021b), it is possible to compose a covariance matrix ( $W$ ) between  
101 trials, which then makes it possible, among other things, to dissect the  $G \times E$  interaction, and to build  
102 environmental relationship matrices for genomic prediction, which better explain the sources of non-genetic  
103 variation, such as the influence of environments on phenotypic variation. Finally, the envirotyping information  
104 can be associated with genomic data in genetic algorithms to better select genotypes and target environments that  
105 are more informative in terms of  $G \times E$  (Costa-Neto et al., 2021a).

106 Compiling these ideas, to optimize TRN sets, MT models may help predict quantitative target traits  
107 based on correlated characteristics. MET models also allow the inclusion of the  $G \times E$  interaction term, which  
108 undoubtedly helps predict non-phenotyped individuals. Finally, envirotyping is an emerging component for

109 selecting fewer but well-optimized trial locations. Therefore, our goal was to test the performance of optimized  
110 training sets (OTS) for multi-trait multi-environmental trials (MTMET), and the use of environmental covariables  
111 (W) in genomic prediction models, with the aim of diminishing the phenotypic labor due to lower but optimally  
112 selected population sizes, while keeping the predictive ability at satisfactory levels, and then compare these results  
113 with benchmarks. For that, we (i) fitted and compared the performance of five different prediction models,  
114 progressively including environmental covariables and interaction terms ( $G \times E$  and  $G \times W$ ); (ii) estimated the  
115 genomic prediction ability of the five prediction models for STMET and MTMET, to use as benchmarks values;  
116 and (iii) estimated the genomic prediction ability using OTS with controlled unbalancing of G, E and trait  
117 information, selected by a genetic algorithm.

## 118 2. MATERIALS AND METHODS

### 119 2.1. Plant material

120 The phenotypic data consisted of two datasets of tropical maize single-cross hybrids. Plant material  
121 was evaluated for the following three traits of agronomic interest: grain yield (GY, in ton ha<sup>-1</sup>), plant height (PH,  
122 in cm), and ear height (EH, in cm). For GY assessment, ears were harvested at physiological maturity, grains were  
123 adjusted to 13% moisture, and the yield was corrected by area and plant population. PH and EH were measured  
124 from the soil surface to the flag leaf collar and the highest ear, respectively, on five representative plants within  
125 each plot.

#### 126 HEL dataset

127 Provided by Helix Seeds (HEL), the first dataset was composed of phenotypic and genotypic data of  
128 452 maize hybrids obtained from single crosses in a partial diallel mating design among 106 tropical maize inbred  
129 lines. In order to balance the data, only genotypes that were evaluated in all locations for all traits were considered,  
130 so that 247 remained for analysis. Balancing the data will later allow the creation of controlled imbalances. The  
131 experimental design used was randomized complete blocks with two replications per genotype per location.  
132 Hybrids were evaluated in trials carried out over the 2014/15 growing season at three locations in Brazil: Ipiacú  
133 (IP) and Pato de Minas (PM) in the state of Minas Gerais, and Sertanópolis (SE) in the state of Paraná.

#### 134 USP dataset

135 The second dataset belongs to the University of Sao Paulo (USP). The data consist of 903 maize single  
136 crosses obtained from a diallel mating design between 49 inbred lines. After balancing the data, 623 genotypes  
137 remained for analysis. Hybrids were evaluated at two locations in Brazil: Piracicaba (PI) and Anhumas (AN), in  
138 São Paulo. They were evaluated for two years during the second growing season of years 2016 and 2017. The  
139 experimental design was an augmented block, with two commercial hybrids as checks per block. Although the  
140 areas are relatively close on the map, the soil and climate conditions are quite contrasting, and thus characterize  
141 different environments, allowing us to consider each location × year combination as an environment: AN.16,  
142 PI.16, AN.17, and PI.17.

143 Further details about both datasets can be found in Alves et al. (2019), Bandeira e Sousa et al. (2017)  
144 and Lyra et al. (2017).

### 145 2.2. Genotypic data

146 Parental inbred lines from HEL and USP datasets were genotyped with an Affymetrix® Axiom® Maize  
147 Genotyping SNP array of 616 K (Unterseer et al., 2014). The genomic quality control (QC) was performed using  
148 the SNPRelate package (Zheng et al., 2012) from R software. Markers with a call rate ≤ 0.95 for HEL and a call  
149 rate ≤ 0.90 for USP, heterozygous loci in at least one of the parental lines, and monomorphic loci were removed.

150 The genotypic data of the hybrids were obtained by combining the homozygous markers of their  
151 parental lines. The imputation of the lines and genotypes was performed by Synbreed (Wimmer et al., 2012) using  
152 the Beagle 4.0 algorithm (Browning & Browning, 2008). Allele frequencies and linkage disequilibrium were  
153 computed using the genotypes of the hybrids. Then, markers with minor allele frequency (MAF) ≤ 0.05 were

154 removed. After QC, 30,467 and 62,409 high-quality SNPs were available to analyze the HEL and USP datasets,  
155 respectively. All the analyses were performed in the R software (R Core team, 2020).

### 156 **2.3. Enviromic data**

157 Enviromental covariables (EC) were obtained from the EnvRtype R package (Costa-Neto et al., 2021b),  
158 to be used as descriptors of the environment for prediction purposes, aiming to increase predictive accuracy (PA)  
159 in multi-environment GP scenarios. EnvRtype is a very practical package to acquire and process weather data.  
160 Based on trial network information like geographical coordinates (WGS84), plant date, and harvest date, the  
161 package collects and processes remote weather data from NASAPower. The environmental factors can be  
162 summarized according to the plant phenology intervals of growth or preestablished fixed time intervals. For this  
163 research, we used five time intervals according to the maize cycle phenology, defined as 0-14, 15-35, 36-60, 61-  
164 90, and 91-120 days after emergency. The environmental factors used were: radiation-related (sunshine hours, in  
165 hours, and total daylength, in hours), radiation balance (insolation incident on a horizontal surface, shortwave,  
166 and downward thermal infrared radiative flux, longwave), and atmospheric demands (rainfall precipitation, in  
167 mm, and relative air humidity, in %) as described in Costa-Neto et al. (2021a). The ECs can be estimated from  
168 mean air temperature and accumulated precipitation over the period, for example, and then used to establish G ×  
169 E interaction. This process creates a covariate matrix of ECs called W, which produces environmental relationship  
170 matrices for genomic prediction. Then we can calculate an enviromic kernel equivalent to a genomic relationship  
171 matrix, as follows (Costa-Neto et al., 2021b):

$$172 \quad K_E = \frac{WW'}{\text{trace}(WW')/\text{nrow}(W)}$$

173 where  $K_E$  is the enviromic-based kernel for the similarity between environments and W is the matrix  
174 of ECs.

175 For the HEL dataset, each environment was characterized by 217 ECs, and for the USP dataset, each  
176 environment was characterized by 238 ECs, resulting in matrices of dimensions  $3 \times 217$  and  $4 \times 238$ , then used  
177 to estimate the W matrix.

178

### 179 **2.4. Variable transformation**

180 We established an index for EH that represents the distance from the actual EH to an ideal ideotype,  
181 defined here as 80 centimeters, according to the following formula:

$$182 \quad EH_{tr} = |EH_{ij} - 80| * (-1)$$

183 where  $EH_{tr}$  is the transformed EH and  $EH_{ij}$  is the EH for genotype  $i$  at environment  $j$ . According to  
184 this index, the closer to zero, the closer to our ideal height. For PH, values were normalized in order to obtain a  
185 normal distribution interval. To fit the models, all phenotypic data were centered and standardized.

## 186 2.5. Statistical analysis

### 187 2.5.1. Phenotypic analysis

188 We used a linear mixed model for the two-step analysis to calculate the best linear unbiased estimates  
189 (BLUEs) of each trait's hybrids. BLUEs were obtained within environments for the USP and HEL datasets by the  
190 following respective models:

$$191$$
$$192 \mathbf{y}_{USPij} = \boldsymbol{\mu} + \mathbf{g}_i + \mathbf{g}^* + \mathbf{bl} + \boldsymbol{\varepsilon}_{ij}$$
$$193 \mathbf{y}_{HELij} = \boldsymbol{\mu} + \mathbf{g}_i + \mathbf{bl} + \boldsymbol{\varepsilon}_{ij}$$
$$194$$

195 where  $\mathbf{y}_{ij}$  is the estimated phenotypic value of genotype  $i$  at environment  $j$ ,  $\boldsymbol{\mu}$  is the general mean or  
196 intercept,  $\mathbf{g}_i$  is the fixed effect of hybrid genotype  $i$ ,  $\mathbf{g}^*$  is the fixed effect of check genotypes,  $\mathbf{bl}$  is the random  
197 effect of blocks for the USP dataset ( $\mathbf{bl} \sim \text{NM}(0, \sigma_{bl}^2)$ ) and the fixed effect of blocks for the HEL dataset, and  
198 finally,  $\boldsymbol{\varepsilon}_{ij}$  is the residual error for genotype  $i$  at environment  $j$ , where  $\boldsymbol{\varepsilon} \sim \text{NM}(0, \sigma^2)$ .

199 Phenotypic analyses were performed using the ASReml-R package (Butler, 2018) of R software (R  
200 Core Team, 2020) and subsequently used in our genomic prediction models.

201 The variance components estimated for each model's effect will be used to estimate the average broad-  
202 sense heritability  $H^2$ .

### 203 2.5.2. Genomic prediction scenarios

204 In order to obtain a benchmark value of PA for the models, we first tested these models in full single-  
205 trait multi-environment trials (STMET) and multi-trait multi-environment trials (MTMET) genomic prediction  
206 analyses. From those, we were able to obtain the highest possible PA for the specific datasets under study because  
207 we used all the information we had available (Fritsche-Neto et al., 2018), through cross-validation schemes with  
208 replication.

209 The algorithms APY (Misztal et al., 2014; Misztal, 2016) and LA-GA-T, from the STPGA R package  
210 (Akdemir, 2017), were used in optimization scenarios. The APY is used for determining the size of samples by  
211 singular value decomposition. LA-GA-T is a genetic-based algorithm used to select representative individuals  
212 from the population and compose the samples. For this purpose, two different kernels were built from the  
213 Kronecker product between the variance-covariance matrices of genotypes (G), environments (E), environmental  
214 covariables (W), and traits (T) as follows:  $\Sigma_G \otimes \Sigma_E \otimes \Sigma_T$  and  $\Sigma_G \otimes \Sigma_W \otimes \Sigma_T$ , hereafter called GET and GWT,  
215 respectively.

216 These kernels, used as inputs for the algorithms, assemble combinations between our variables. Thus  
217 APY gives us the number of components that explain 98% of the variation within the population, and LA-GA-T  
218 selects that number of representative information inside the kernels. Moreover, a genotype was added as a check  
219 and therefore evaluated in all environments to create a connection between environments.

220 The optimized samples from LA-GA-T were obtained three times for each dataset and considered the  
221 training set (TRN), while the remaining individuals were used as a testing set (TST). From these three samples  
222 (OTS 1), two other scenarios were created, always within kernels. The former one was created by combining the

223 samples two by two (OTS 2), which resulted in three replicates. In the latter, the three independent samples were  
224 added together (OTS 3), resulting in just one and bigger optimized training set (OTS).

### 225 **2.5.3. Genomic prediction via single and multi-trait multi-environment models with additivity and** 226 **dominance effects**

227 The genomic prediction was first performed by five GBLUP additive + dominance models for STMET  
228 and MTMET scenarios. The following models were already tested (for further details, see Costa-Neto et al.,  
229 2021a).

230

#### 231 **Model 1 (M1): Environment and main additive plus dominance genomic effects (EAD)**

232 M1 is the most basic model tested, described as follows:

$$233 \quad \mathbf{y} = \mathbf{Z}_E \boldsymbol{\beta} + \mathbf{Z}_G \mathbf{u}_A + \mathbf{Z}_G \mathbf{u}_D + \boldsymbol{\varepsilon}$$

234 where  $\mathbf{y}$  is the adjusted observed values (BLUEs) obtained from the first step for the hybrids. The fixed  
235 effects of environment were modeled by  $\mathbf{Z}_E \boldsymbol{\beta}$  with the incidence matrix  $\mathbf{Z}_E$ , and  $\mathbf{Z}_G$  is the incidence matrix for  
236 the genotypic effects.  $\mathbf{u}_A$  is the vector of additive genetic effects, where  $\mathbf{u}_A \sim MN(\mathbf{0}, \mathbf{G}_a \sigma_A^2)$ ,  $\mathbf{u}_D$  is the vector of  
237 dominance effects, where  $\mathbf{u}_D \sim MN(\mathbf{0}, \mathbf{G}_d \sigma_D^2)$ , and  $\boldsymbol{\varepsilon}$  is the random residual effect, where  $\boldsymbol{\varepsilon} \sim MN(\mathbf{0}, \sigma_e^2 \mathbf{I})$ .  $\mathbf{G}_a$  and  
238  $\mathbf{G}_d$  are the genomic relationship matrices (GRM) for additive and dominant effects, respectively, given according  
239 to VanRaden (2008) as follows:

$$240 \quad \mathbf{G}_a = \frac{W_A W_A'}{2 \sum_i^n p_i (1 - p_i)}$$

241 where the values from the incidence matrix  $W_A$  are equal to 0, 1 and 2, for genotypes markers of  $A_1A_1$ ,  
242  $A_1A_2$  and  $A_2A_2$ , respectively, and  $p_i$  is the frequency of one allele from  $i$  locus.

$$243 \quad \mathbf{G}_d = \frac{W_D W_D'}{4 \sum_i^n \{(p_i(1 - p_i))\}^2}$$

244 where  $W_D$  contains the values equal to 0 (zero) for both homozygotes  $A_1A_1$  and  $A_2A_2$ , and equal to 1 for  
245 heterozygotes  $A_1A_2$ .

246

#### 247 **Model 2 (M2): Environment, main effects plus block diagonal GE (EAD+GE)**

248 This model is an update of M1 that accounts for the main effects (A and D), adding the additive  $\times$   
249 environment and dominance  $\times$  environment interactions effects (AE and DE).

$$250 \quad \mathbf{y} = \mathbf{Z}_E \boldsymbol{\beta} + \mathbf{Z}_G \mathbf{u}_A + \mathbf{Z}_G \mathbf{u}_D + \mathbf{u}_{AE} + \mathbf{u}_{DE} + \boldsymbol{\varepsilon}$$

251 where  $\mathbf{u}_{AE}$  and  $\mathbf{u}_{DE}$  are the vectors of random effects of the interactions.  $\mathbf{u}_{AE}$  and  $\mathbf{u}_{DE}$  have a  
252 multivariate normal distribution,  $\mathbf{u}_{AE} \sim MN(\mathbf{0}, [\mathbf{Z}_G \mathbf{A} \mathbf{Z}_G'] \odot [\mathbf{Z}_E \mathbf{Z}_E'] \sigma_{ae}^2)$  and  $\mathbf{u}_{DE} \sim MN(\mathbf{0}, [\mathbf{Z}_G \mathbf{D} \mathbf{Z}_G'] \odot$   
253  $[\mathbf{Z}_E \mathbf{Z}_E'] \sigma_{de}^2)$ , where  $\sigma_{ae}^2$  and  $\sigma_{de}^2$  are the variance components for  $\mathbf{u}_{AE}$  and  $\mathbf{u}_{DE}$  interaction effects, respectively  
254 (Bandeira e Sousa et al., 2017; Jarquín et al., 2014; Lopez-Cruz et al., 2015).

255

#### 256 **Model 3 (M3): Main effects plus main environmental covariable information (EAD+W)**

257 This third model includes environmental covariables information (W) from envirotyping data.



258 
$$\mathbf{y} = \mathbf{Z}_E \boldsymbol{\beta} + \mathbf{Z}_G \mathbf{u}_A + \mathbf{Z}_G \mathbf{u}_D + \mathbf{u}_W + \boldsymbol{\varepsilon}$$

259 where  $\mathbf{u}_W$  is the matrix of environmental covariables, as according to Costa-Neto et al. (2021a), it is  
260 non-genetic information that fills the gap between the genomic phenotypic information that remains across  
261 environments.

262

263 **Model 4 (M4): Main effects EADW plus reaction norm for GE (EAD+W+GE)**

264 This model is an extension of the previous model (M3), adding the environment's additive and  
265 dominance interactions.

266 
$$\mathbf{y} = \mathbf{Z}_E \boldsymbol{\beta} + \mathbf{Z}_G \mathbf{u}_A + \mathbf{Z}_G \mathbf{u}_D + \mathbf{u}_W + \mathbf{u}_{AE} + \mathbf{u}_{DE} + \boldsymbol{\varepsilon}$$

267

268 **Model 5 (M5): Main effects EAD plus W plus reaction norm for GW (EAD+W+GW)**

269 This model is a modification of the latter (M4) reaction-norm variation; it replaces the genomic  $\times$   
270 environment interactions with the genomic  $\times$  enviromic effects interactions.

271 
$$\mathbf{y} = \mathbf{Z}_E \boldsymbol{\beta} + \mathbf{Z}_G \mathbf{u}_A + \mathbf{Z}_G \mathbf{u}_D + \mathbf{u}_W + \mathbf{u}_{AW} + \mathbf{u}_{DW} + \boldsymbol{\varepsilon}$$

272

273 where  $\mathbf{u}_{AW}$  and  $\mathbf{u}_{DW}$  are the vectors of random effects of interactions.  $\mathbf{u}_{AW}$  and  $\mathbf{u}_{DW}$  have a multivariate  
274 normal distribution,  $\mathbf{u}_{AW} \sim MN(\mathbf{0}, [\mathbf{Z}_G \mathbf{A} \mathbf{Z}_G'] \odot [\mathbf{W}\mathbf{W}'] \sigma_{aw}^2)$  and  $\mathbf{u}_{DW} \sim MN(\mathbf{0}, [\mathbf{Z}_G \mathbf{D} \mathbf{Z}_G'] \odot [\mathbf{W}\mathbf{W}'] \sigma_{dw}^2)$ .  
275 Here we can assume that there are different levels of relationship between genotypes and environments.

276 All models were fitted with the Bayesian Generalized Linear Regression BGLR R package (Pérez &  
277 de los Campos, 2014a; Pérez & De Los Campos, 2014b), using a Gibbs sampler with 10,000 iterations, assuming  
278 a burn-in of 1,000, and a thinning of 2.

279 It is important to point out that the "Multitrait" function of the BGLR package has some basic premises  
280 that must be met for the model to work, one of which is the availability of complete information from at least one  
281 genotype. Here, as we used multiple traits with the multiple environments approach, we established a genotype  
282 as a check, with complete phenotypic data available, common to all environments. This way, it was possible to  
connect the environments, especially when we explored the  $G \times E$  interaction.

283 **2.6. Assessing the predictive ability of the models**

284 Two cross-validation schemes were used to access GP models' predictive ability, proposed by  
285 Burgueño et al. (2012).

286 The first validation scheme, known as CV1, was applied considering 50 random partitions with 70%  
287 of phenotypic and genotypic (genotypes phenotyped for all traits in all environments) information as TRN, while  
288 the remaining 30% (genotypes not phenotyped in any of the environments) were predicted, using only their  
289 genotypic information. This scheme aims to quantify GP models' ability and reproduce a scenario frequently faced  
290 by breeders when predicting new genotypes in a network of already known environments, i.e., newly developed  
291 maize hybrids never evaluated in any environment. The second scheme, CV2, mimics another common situation  
292 when genotypes are tested in unbalanced field trials (or incomplete field trials), i.e., some genotypes are evaluated  
293 in some environments but not in the entire experimental network. For this scheme, we also used 50 random  
294 partitions with 70% of the information (genotype–environment combinations) as TRN, and the remaining 30% as  
295 TST.

296 For each TRN-TST partition, models were fitted using the TRN, and we performed Pearson's  
297 correlation coefficient between the predicted value and the observed value or BLUE of the TST individuals within  
298 each environment, for each one of the 50 partitions. Then these correlations were used to assess the accuracy and  
299 compare the performance of each model. Since the BLUEs were calculated by environment, the PAs were also  
300 calculated by environment. The same 50 TRN-TST partitions were used to fit each model, allowing access to the  
301 best performance model.

302 For OTS, the predictive ability was also calculated as the Pearson's correlation coefficient between the  
303 predicted value and the adjusted observed value or BLUE of the TST individuals within each environment for  
304 each trait; then the average of environments was taken.

## 305 **2.7. Response to selection per unit invested**

306 The genetic gain per dollar invested was estimated to compare the efficiency of the scenarios tested in  
307 this work with pure phenotypic selection (PS). The methodology was based on information from Krchov &  
308 Bernardo (2015) and Muleta et al. (2019). The phenotyping costs assumed were: 2 US dollars (USD) per plot per  
309 trait for PH and EH; 4 USD per plot for GY. For genotyping, we considered 20 USD per sample. As we are  
310 dealing with F1 maize hybrids, the parental inbred lines were genotyped, and the hybrid genotype was assembled  
311 in silico. This way, the total cost was the sum of the expenses with genotyping (20 USD × number of lines) plus  
312 phenotyping the TRN. This calculation was made for each dataset × scenario, considering the three OTS scenarios  
313 (OTS 1, OTS 2 and OTS 3) for each kernel and the MTMET CV2 standard scenario. For the phenotypic selection  
314 scenario, the average accuracy ( $\sqrt{H^2}$  of each trait) was divided by phenotyping cost, 8 USD per plot for all traits,  
315 for the complete dataset. The genetic gain was estimated by dividing the PA by the corresponding cost and  
316 subsequently transformed to the base of 10,000 USD, given the fact that the other components of the breeder's  
317 equation (Lush, 1937) were considered as fixed.

## 318 3. RESULTS

### 319 3.1. Descriptive statistics

320 Pearson's correlation between traits was calculated for each dataset using the BLUEs obtained in the  
321 first step. As a consequence of the EH transformation, GY assumed a negative correlation with the other traits.  
322 For the HEL dataset, GY had a moderately negative correlations with PH and EH, of  $-0.55$  and  $-0.58$ ,  
323 respectively, while PH and EH had a high positive correlation of  $0.82$ . For the USP dataset, GY had weak negative  
324 correlations with PH and EH, of  $-0.44$  and  $-0.33$ , respectively, while PH and EH had a high positive correlation  
325 of  $0.70$ .

326 Estimated heritability was intermediate to high: for the HEL dataset, trait heritability was  $0.62$ ,  $0.78$   
327 and  $0.80$  for GY, PH and EH respectively; for the USP dataset, heritability was  $0.56$  for GY,  $0.84$  for PH and  $0.89$   
328 for EH.

329 As expected, the correlation for the complex trait GY was lower than for PH and EH; additionally, the  
330 complex trait had a lower heritability than the auxiliary ones.

### 331 3.2. Optimized training sets (OTS)

332 The first result of selecting information to form the training populations, using the APY algorithm,  
333 returned the effective population sizes ( $N_e$ ) for each kernel, as described below. *HEL dataset*: GET – OTS 1: 155  
334 combined information of genotype  $\times$  environment  $\times$  trait selected to form the TRN, which represents 7.4% of  
335 observations; GWT– OTS 1: 102 combined information of genotype  $\times$  environment  $\times$  trait selected to form the  
336 TRN, based on environmental covariables (W), representing 5% of observations. *USP dataset*: GET– OTS 1: 267  
337 combined information of genotype  $\times$  environment  $\times$  trait selected to form the TRN set, representing 3.7% of  
338 observations; GWT– OTS 1: 107 combined information of genotype  $\times$  environment  $\times$  trait selected to form the  
339 TRN set, representing 1.6% of observations. Sample size differs depending on the kernel and germplasm because  
340 the amount of available information varies as well as the genomic source. From this number, in order to minimize  
341 the stochastic error, the LA-GA-T algorithm was performed three times to select the individuals. Thus, the first  
342 validation scheme was done for OTS 1; the second combining the three basic populations, two by two, also  
343 resulting in three different repetitions, where for Helix the  $N_e$  were: GET – OTS 2 = 306, representing 13.8% and  
344 GWT – OTS 2 = 206, representing 9.3% of total observations, respectively, and for USP: GET – OTS 2 = 533,  
345 representing 7.1% and GWT – OTS 2 = 224, representing 3% of total observations, respectively. Finally we added  
346 the three repetitions of the base population to form a larger, but optimized, training population, which corresponds  
347 to Helix: GET – OTS 3 = 436, representing 19.6% and GWT – OTS 3 = 300 representing 13.5% of total  
348 observations, and for USP: GET – OTS 3 = 775, representing 10.4% and GWT – OTS 3 = 326, representing 4.4%  
349 of total observations, respectively. The difference in selecting information between the three repetitions from the  
350 different OTS tested scenarios can be seen in the heatmaps for Helix (**Fig. 1a-f**) and USP (**Fig. 2a-f**).

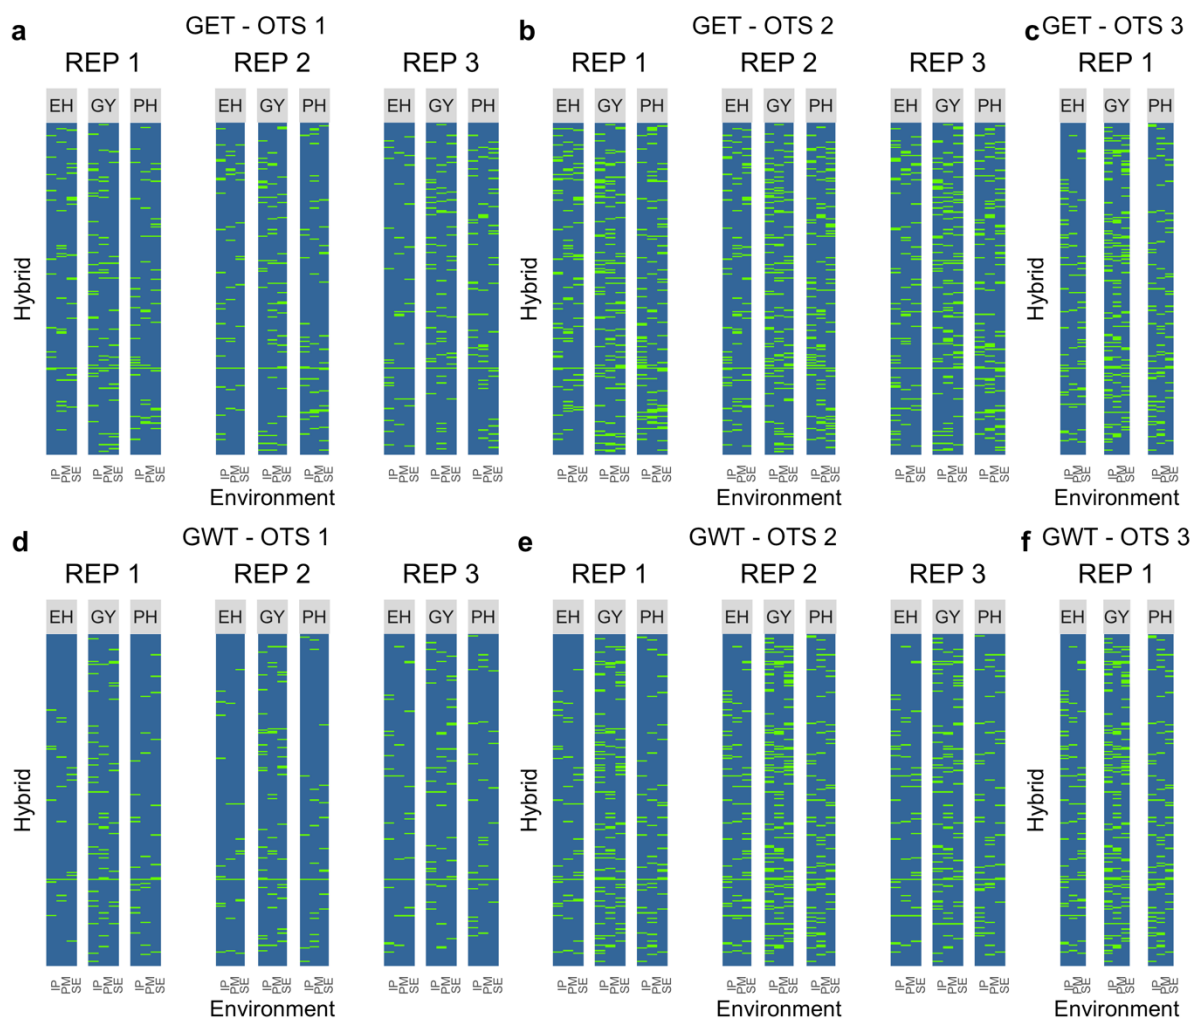

351

352 **Fig. 1** Heatmap of OTS (optimized training sets) graph for the Helix dataset. (a) OTS 1 for kernel GET. (b) OTS  
 353 2 for kernel GET. (c) OTS 3 for kernel GET. (d) OTS 1 for kernel GWT. (e) OTS 2 for kernel GWT. (f) OTS 3  
 354 for kernel GWT. In green are the hybrids selected to form the training population, for each trait × environment  
 355 and repetition inside kernels. The solid line that crosses all the graphs represents the genotype used as a check.  
 356 The environments on the x-axis: IP (Ipiacú), PM (Patos de Minas), and SE (Sertanópolis); the traits under study:  
 357 EH (ear height), GY (grain yield), and PH (plant height). The kernels: GET (genotype × environment × trait) and  
 358 GWT (genotype × environmental covariables × trait) used as the base to select information

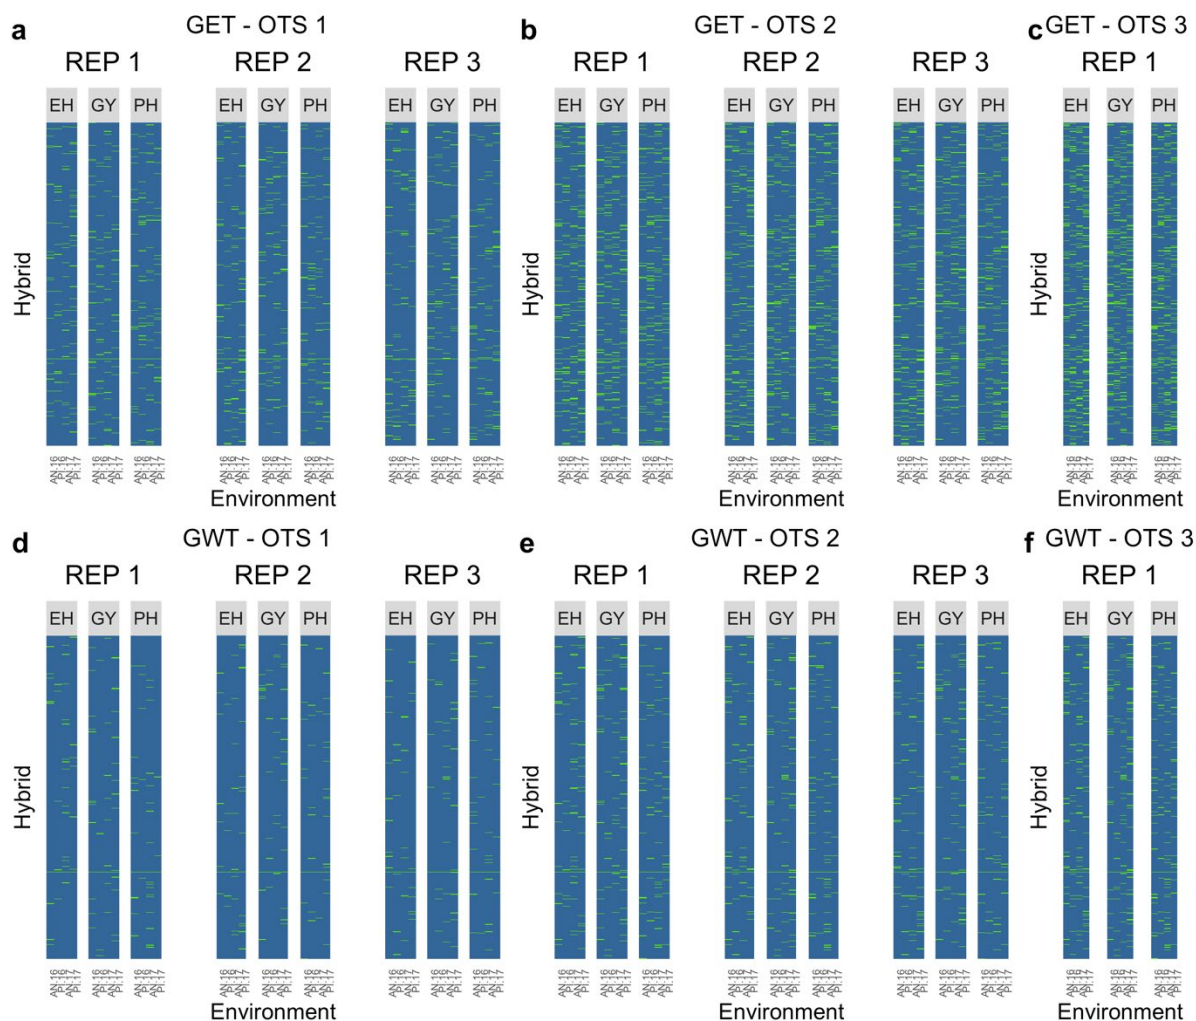

359

360 **Fig. 2** Heatmap of OTS (optimized training sets) graph for the USP dataset. (a) OTS 1 for kernel GET. (b) OTS  
 361 2 for kernel GET. (c) OTS 3 for kernel GET. (d) OTS 1 for kernel GWT. (e) OTS 2 for kernel GWT. (f) OTS 3  
 362 for kernel GWT. In green we see the distribution of the hybrids selected to form the training population, for each  
 363 trait x environment and repetition inside kernels. The solid line that crosses all the graphs represents the genotype  
 364 used as a check. The environments on the x-axis: AN.16 (Anhembi 2016), PI.16 (Piracicaba 2016), AN.17  
 365 (Anhembi 2017) and PI.17 (Piracicaba, 2017); the traits under study: EH (ear height), GY (grain yield) and PH  
 366 (plant height). The kernels: GET (genotype × environment × trait) and GWT (genotype × environmental  
 367 covariables × trait) are used as the base to select information

### 368 3.3. Predictive abilities of the five models over STMET and MTMET scenarios

#### 369 HEL dataset

370 *Single-trait multi-environment trial analysis:* Results for CV1 showed, on average, PAs varying from  
 371 0.53 to 0.73 (**Supplementary Table 1**). However, individually, environment SE was inferior in predicting GY,  
 372 mainly when models without  $G \times E$  interactions (**M1** and **M3**) were used. In contrast, models including  $G \times E$   
 373 (**M2** and **M4**) increased PA from 100 to 104% and  $G \times W$  (M5) increased PA by 92% for this specific trait ×  
 374 environment; considering the average within environments, PA for GY between models varies from 3 to 19%.  
 375 For EH and PH, PAs were higher, from 0.70 to 0.73, and differences between models were minimal, from 0 to  
 376 2%. Results for CV2 (Supplementary Table 1) produced the same patterns as those for CV1, ranging from 0.52  
 377 to 0.79 when the overall average of environments was considered. For GY in the SE environment, PA could

378 increase between 61 to 68% when models with  $G \times W$  (**M5**) and  $G \times E$  interactions (**M2** and **M4**) were used,  
379 respectively. For EH and PH, the accuracies were similar within models, with a maximum difference of 2%.  
380 Comparing CV1 with CV2, PA means increased from 3 to 8%, and differences were higher for PH and EH. In  
381 general, **M4** showed the best performance. Overall, the greatest difference was observed for GY, between models  
382 **M1** and **M3** (without  $G \times E$  interaction) and **M2** and **M4** (with  $G \times E$  interaction), where **M4** (**M2**) outperformed  
383 **M3** (**M1**) by between 25 and 30%, however, M5 also outperformed **M3** (**M1**) by 29%.

384 *Multi-trait multi-environment trial analysis:* As for the STMET analysis, the results of the multi-trait  
385 analysis showed a similar pattern of responses, both for CV1 and CV2, varying from 0.54 to 0.73 and 0.53 to  
386 0.79, respectively (**Supplementary Table 2**). Nevertheless, we noticed that PAs increased between 61 and 68%  
387 for CV1 in the SE environment, which showed the lowest PA for GY in MTMET, like for STMET, when not  
388 exploring  $G \times W$  and  $G \times E$  interaction effects. Considering the average within environments, the PA variation  
389 for GY between models was practically identical to that of STME (0-24%). For EH and PH, accuracy varied from  
390 0.70 to 0.73 and 0.75 to 0.79 for CV1 and CV2, respectively, but in general, the means ranged from 0 to 1%,  
391 where **M4** performed better. Comparing CV1 with CV2, the PAs increased from 2.4 to 7.7%, with higher PA  
392 differences for GY. Comparing STMET with MTMET, PAs rose from 0 to 1.4%, where the differences were  
393 higher for GY and nonexistent for PH.

#### 394 USP dataset

395 *Single-trait multi-environment trial analysis:* Results for CV1 showed PAs varying from 0.46 to 0.65.  
396 The PI.17 environment isolated was inferior for predicting EH when models without  $G \times E$  interactions (**M1** and  
397 **M3**) were used (**Supplementary Table 3**). In contrast, models with  $G \times E$  (**M2** and **M4**) could increase the  
398 accuracy up to 440% in the PI.17 environment for EH (considering the overall average within environments, PA  
399 for EH varied from 0 to 7%) and model with  $G \times W$  increased PA by 420% for the same environment  $\times$  trait;  
400 other environments performed very well for EH, with PA from 0.66 to 0.80. For GY, PA ranged from 0.42 to  
401 0.51. For PH, PA were high, from 0.63 to 0.68 between environments, with no difference between models. Results  
402 for CV2 produced almost the same patterns as those for CV1. For EH in the PI.17 environment, PA could increase  
403 by 340% when models with  $G \times E$  interactions were used and 320% when using  $G \times W$ . Despite the environment,  
404 PI.17 for EH, the accuracy of all other traits and environments was similar within models, with differences of  
405 around 0 to 5%. In general, **M4** showed the best performance. Comparing CV1 with CV2, the PA increased from  
406 4 to 8% for GY and PH, respectively.

407 *Multi-trait multi-environment trial analysis:* As for the STMET analysis, the results of the multi-trait  
408 analysis showed similar response patterns, both for CV1 and CV2 (**Supplementary Table 4**). Nevertheless, PAs  
409 increased between 4 and 8%. Also for STMET, the PI.17 environment showed low PA for EH in MTMET, but  
410 by exploring  $G \times E$ , accuracy increased up to 333%. For GY, accuracies varied from 0.42 to 0.52, and for PH,  
411 from 0.63 to 0.72, but for both, in general, the means did not vary. Comparing STMET with MTMET, PAs  
412 changed from 0 to 0.4%. Including interaction effects (no matter if  $G \times E$  or  $G \times W$ ) always increased PA.

413

414 **3.4. Predictive ability for OTS scenarios**

415 Similar to what was done previously, for the optimized training sets, the five models were also tested.  
416 The model that achieved the best performance was the **M4**, so only this result will be presented. *Helix dataset*: In  
417 the overall average of traits, for OTS 1, PAs were 0.55 and 0.41 for kernels GET and GWT, respectively. Those  
418 values increased to 0.63 (+15.9%) and 0.50 (+22.6%), then 0.68 (+7.7%) and 0.61 (+21.4%), for OTS 2 then OTS  
419 3, while the maximum PA obtained by the benchmark CV2 was 0.74 (**Table 1** and **Fig. 3**). *USP dataset*: in the  
420 overall average of traits, for OTS 1, PAs were 0.41 and 0.24 for kernels GET and GWT, respectively. Following  
421 the same pattern, when we increased the size of TRN, those values increased to 0.47 (+15.6%) and 0.30 (+24.4%)  
422 for OTS 2, then 0.52 (+9%) and 0.44 (+46.5%) for OTS 3, while the maximum PA obtained by the benchmark  
423 CV2 was 0.61 (**Table 1** and **Fig. 4**).

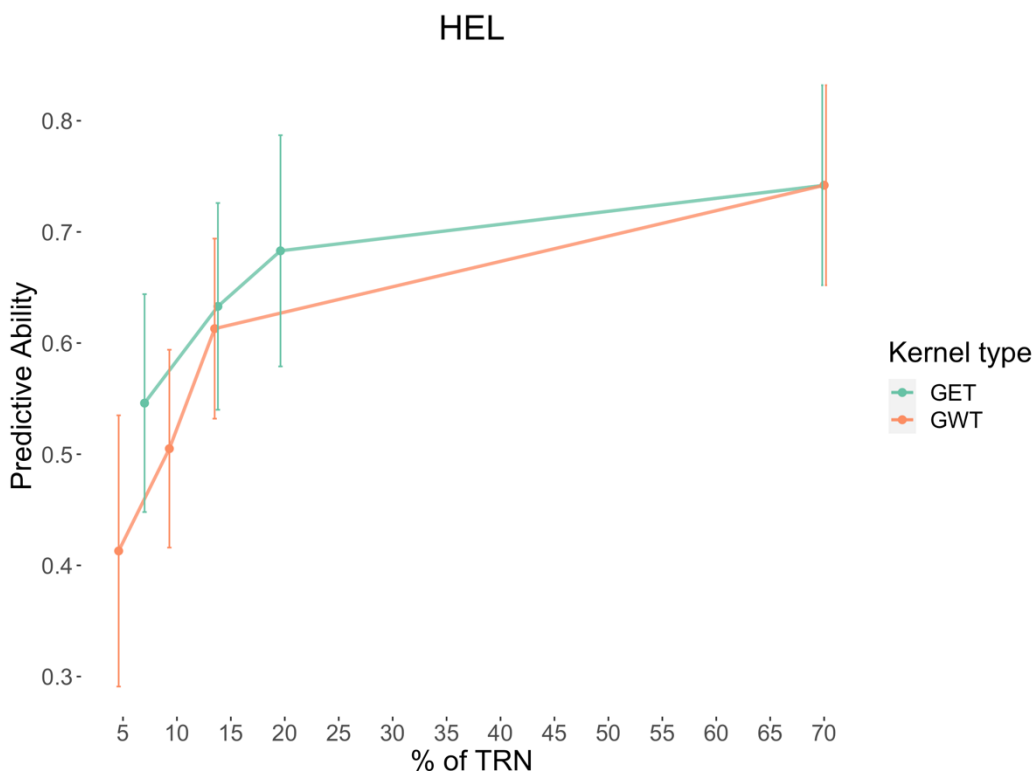

424 **Fig. 3** The trend graph shows the increase in the average PA (predictive ability, mean of environments and traits)  
425 according to increases in the Helix dataset's training set size. GET and GWT are the kernels used as the basis for  
426 selection of information by the LA-GA-T algorithm. The 4 points on each line correspond to OTS1, OTS2, OTS3  
427 and finally CV2, which is a benchmark or the highest value achieved with this dataset under this particular study's  
428 conditions  
429

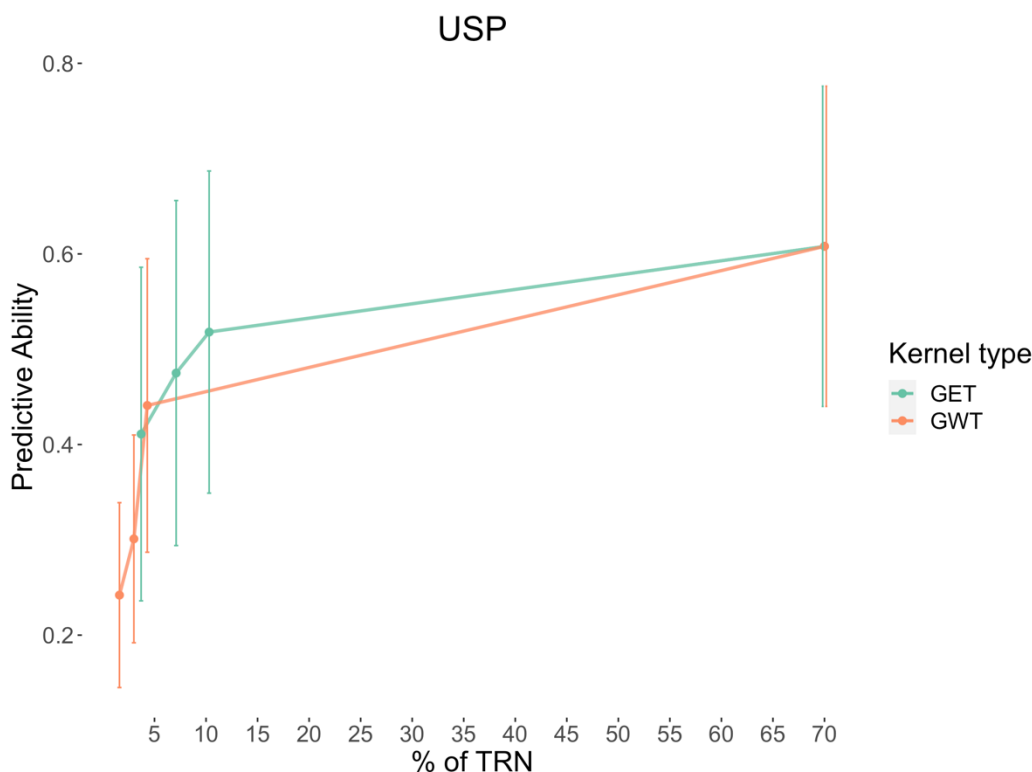

430

431 **Fig. 4** The trend graph shows the increase in the average (predictive ability, mean of environments and traits)  
 432 according to increases in the USP dataset's training set size. GET and GWT are the kernels used as the basis for  
 433 selection of information by the LA-GA-T algorithm. The 4 points on each line correspond to OTS1, OTS2, OTS3  
 434 and finally CV2, which is our benchmark or the highest value achieved with this dataset under this particular  
 435 study's conditions

436 **Table 1** Average increase, per trait, in predictive ability, according to an increase in the training set (denoted here  
 437 as OTS 1, 2 and 3), for both GET and GWT kernels, in the Helix and USP datasets. Ne: number of information  
 438 used as the training set; prediction accuracies for EH: ear height, GY: grain yield and PH: plant height. Values in  
 439 parentheses show the percentage increase between that value and the value immediately preceding it

|       |     | GET                    |                  |                  |                  | GWT                    |                  |                  |                  |
|-------|-----|------------------------|------------------|------------------|------------------|------------------------|------------------|------------------|------------------|
|       | OTS | Ne                     | EH               | GY               | PH               | Ne                     | EH               | GY               | PH               |
| Helix | 1   | <b>155</b>             | 0.61             | 0.47             | 0.56             | <b>102</b>             | 0.43             | 0.42             | 0.38             |
|       | 2   | <b>306</b><br>(+97%)   | 0.67<br>(+11,2%) | 0.56<br>(+18%)   | 0.66<br>(+19,2%) | <b>206</b><br>(+100%)  | 0.54<br>(+23,5%) | 0.50<br>(+19,8%) | 0.48<br>(+24,3%) |
|       | 3   | <b>436</b><br>(+42%)   | 0.72<br>(+7%)    | 0.60<br>(+7,7%)  | 0.72<br>(+8,5%)  | <b>300</b><br>(+45%)   | 0.64<br>(+18,4%) | 0.60<br>(+19,3%) | 0.63<br>(+26,7%) |
|       |     | GET                    |                  |                  |                  | GWT                    |                  |                  |                  |
|       | OTS | Ne                     | EH               | GY               | PH               | Ne                     | EH               | GY               | PH               |
| USP   | 1   | <b>267</b>             | 0.47             | 0.28             | 0.48             | <b>107</b>             | 0.22             | 0.19             | 0.32             |
|       | 2   | <b>533</b><br>(+91.9%) | 0.52<br>(+12.6%) | 0.34<br>(+19.8%) | 0.56<br>(+16%)   | <b>224</b><br>(+87.5%) | 0.31<br>(+42.2%) | 0.23<br>(+23%)   | 0.36<br>(+12.8%) |
|       | 3   | <b>775</b><br>(+45%)   | 0.56<br>(+5.9%)  | 0.40<br>(+17%)   | 0.61<br>(+8.7%)  | <b>326</b><br>(+43%)   | 0.43<br>(+39%)   | 0.35<br>(+51.5%) | 0.54<br>(+49.2%) |

440

### 441 3.5. Response to selection per amount invested

442 The genetic gain per dollar per 10,000 USD invested was estimated for each dataset × OTS' scenario,  
 443 primarily to compare the efficiency at the kernel level. Then, between scenarios: OTS *versus* MTMET CV2 and  
 444 OTS *versus* phenotypic selection, within datasets.



445 For the *HEL dataset*, the results showed an inversion of gain between the kernels over scenarios. While  
 446 the GET kernel started at  $0.80 \times 10^{-3}$  and went to  $0.58 \times 10^{-3}$ , the GWT kernel started at  $0.70 \times 10^{-3}$  and went to  
 447  $0.67 \times 10^{-3}$  gain per 10,000 USD invested. For PS, the gain was  $0.14 \times 10^{-3}$  (**Fig. 5**).

448 For the *USP dataset*, the GET kernel started with a gain of  $1.29 \times 10^{-3}$ , and went to  $0.47 \times 10^{-3}$ , while  
 449 the GWT kernel started at  $1.42 \times 10^{-3}$  and went to  $1.15 \times 10^{-3}$ . For PS, the gain was  $0.04 \times 10^{-3}$ .

450 As a matter of comparison, we did the same procedure for the standard scenario MTMET CV2 (for  
 451 **M4**) and the gains per investment were  $0.16 \times 10^{-3}$  for HEL and  $0.02 \times 10^{-3}$  for the USP dataset.

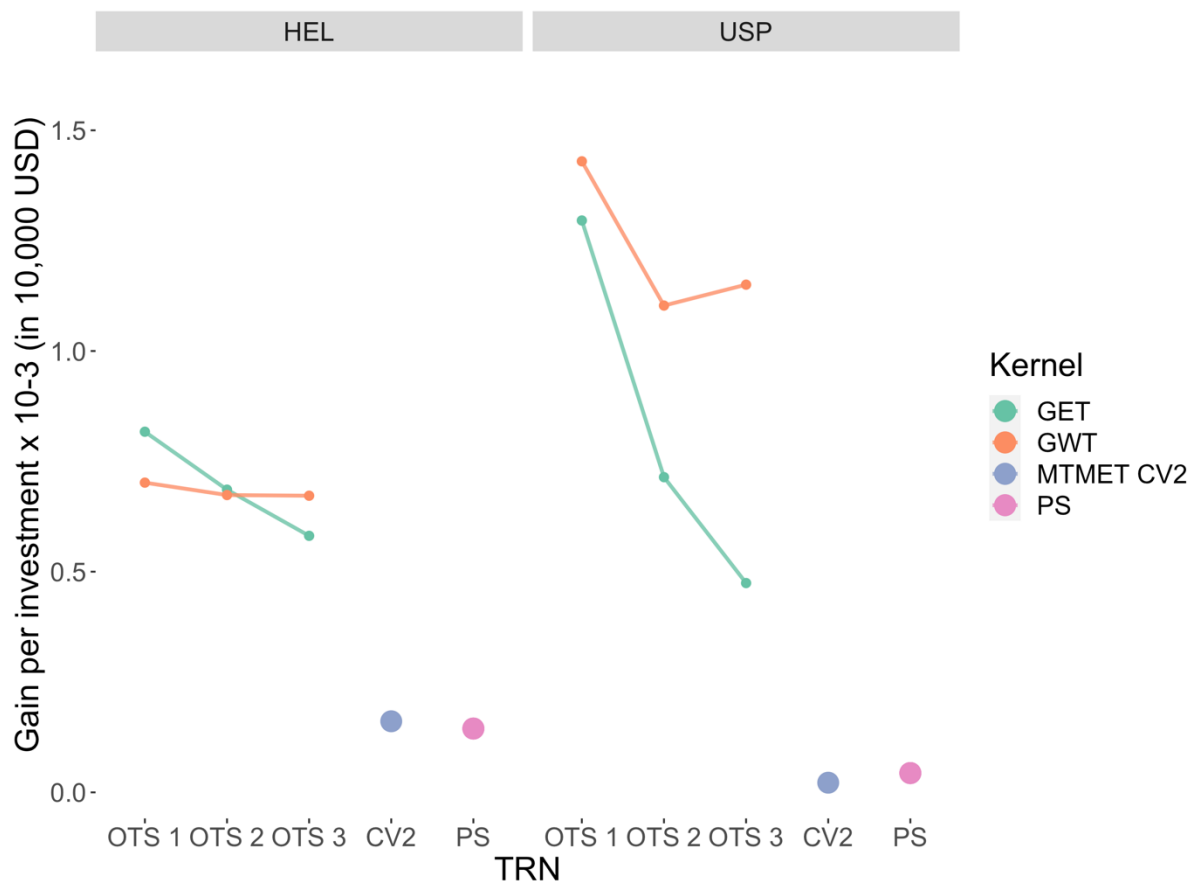

452 **Fig. 5** Gain per cost  $\times 10^{-3}$  (per 10,000 dollars invested) for the HEL and USP datasets, comparing the two  
 453 optimization kernels (GET and GWT) and the standard scenario (MTMET CV2, TRN = 70%). The cost includes  
 454 the phenotyping of TRN (3 USD per trait per plot) and the whole dataset's genotyping (20 USD per sample)  
 455

456

#### 457 4. DISCUSSION

458 The major goal of GS can be defined as increasing the genetic gain with no increase in costs compared  
459 to phenotypic selection only (Crossa et al., 2017; Werner et al., 2020), thus compensating the loss in predictive  
460 ability by the gains in response to selection.

461 The traits evaluated here are moderately to strongly positively correlated by Pearson's correlation  
462 coefficient. However, the selection targets for them in a real breeding program are in opposite directions. While  
463 we want to increase grain yield, we want to decrease plant height and stabilize ear height. Dwarf plants with high  
464 yield are already a reality in other crops like wheat and rice. However, in maize, dwarfing mutant genes have been  
465 studied. Unlike wheat and rice, PH in maize is a quantitative trait that affects other plant characteristics like yield  
466 losses, making it difficult to apply (Chen et al., 2018). Since we want all those attributes simultaneously, we  
467 created a selection index for EH, which measures the distance from the ideal ideotype defined here as 80  
468 centimeters. Then, traits assume a negative correlation between them due to the index, allowing us to select for  
469 all the traits concurrently (Wang et al., 2018).

470 Similar to what Ibba et al. (2020) and Werner et al. (2020) reported and to what was expected, accuracy  
471 is specific to the population, which depends on many other factors like the model chosen, the traits to be predicted,  
472 trait heritability, the correlation between traits, the environments, and the correlation between environments. So,  
473 the results here were no exception. Differences in predictive ability between the two datasets, which occurred for  
474 the benchmarks (CV1 and CV2) and OTS's kernels (GET and GWT), can be partially attributed to differences  
475 in Pearson's correlation coefficient between traits, since PA is directly related to the correlation between traits  
476 (Lado et al., 2018).

477 We could see that some models overperformed others, which was also expected since they contain  
478 additional terms or variance components such as environmental covariables (**W**) and interaction terms (**G × E**  
479 and **G × W**) that better capture the portion of variance explained by the model (Alves et al., 2019). Results of  
480 Dias et al. (2018) suggested that GBLUP models that contain additivity, dominance and  $G \times E$  interaction should  
481 be preferred for predicting the performance of newly developed hybrids in any MET analyses, as is the case with  
482 STMET and MTMET under CV1, and OTS.

483 In this study, two cross-validation schemes, CV1 and CV2 (Burgueño et al., 2012), were used to  
484 evaluate PA for both STMET and MTMET models. For all combination scenarios of dataset, model, single or  
485 multi-trait, CV2 outperformed CV1, because, in this scheme, we have phenotypic information of genotypes in  
486 some environments, but not in others, which helped increase the PA of the models. With CV1 and CV2, single-  
487 trait and multi-trait genomic predictions with multi-environment trials are well described and established in the  
488 general literature and for the data used in this study (Bandeira e Sousa et al., 2017; Alves et al., 2019). Random  
489 cross-validation schemes CV2 and CV1 combined with STMET and MTMET were then used here as benchmarks  
490 and as a matter of comparison for the five different prediction models tested (Werner et al., 2020). Thus, based  
491 on this prior validation, the model with the highest accuracies (**M4**) was chosen for the prediction using the  
492 optimized training set populations, and those validations were also used in a scale as a comparison parameter for  
493 prediction accuracies while increasing the effective population sizes of TRN (see **Fig. 3** and **Fig. 4**). Note that the  
494 model whose performance was superior includes the  $G \times E$  interaction component, in agreement with what has  
495 already been reported by several authors (Acosta-Pech et al., 2017; Burgueño et al., 2012; Dias et al., 2018;

496 Jarquin et al., 2020; Montesinos-López et al., 2019; Robert et al., 2020) and more recently, by Jarquin et al. (2021).  
497 As well, adding the interaction effect  $G \times W$  (M5) increases PA when compared to the main effects models (M1  
498 and M3), but not as much as models containing the  $G \times E$ , similar to what was already presented by Robert et al.  
499 (2020) and Jarquin et al. (2021); however,  $G \times W$  has the advantage of predicting new environments (Costa-Neto  
500 et al., 2021a; Jarquin et al., 2021; Robert et al., 2020), which has not been tested here. Also, MTMET models  
501 gave a small increase in PA compared with STMET, especially for models containing the  $G \times E$  term (Lyra et  
502 al., 2017; Mendonça & Fritsche-Neto, 2020). Furthermore, as Costa-Neto et al. (2021a) reported, including the  
503 W matrix helps increase PA, especially in the case of untested hybrids and/or untested environments, by better  
504 explaining sources of variation, capturing the environment potential per se and its interaction with the genotypes.  
505 Nevertheless, in the present study, and according to what was presented by Jarquin et al. (2021), the inclusion of  
506 W matrix alone (M3) did not improve PA, but was similar to the M1; and the inclusion of W with  $G \times E$  in M4,  
507 gave similar results as the  $G \times E$  alone (M2). Despite that, the W matrix allows optimizing complex information,  
508 as we saw in our OTS's scenarios, then optimizing trials (Jarquin et al., 2021).

509         Studies involving SNP data, such as GP, require the inverse of the genomic relationship matrix (GRM).  
510 However, as the number of individuals to be evaluated increases, the computational cost of this matrix's inversion  
511 is relatively high, with limitations in memory and time. In order to minimize this problem, Misztal (2016)  
512 proposed the algorithm for proven and young animals (APY). Using the APY it is not necessary to make a  
513 complete inversion of the GRM, since its result returns the number of individuals ( $n$ ) needed to sample 98% of  
514 the population variation; then the inverse of GRM can be obtained by recursion, based on the information of the  
515 core individuals. Despite reducing the number of individuals, this algorithm does not specifically indicate which  
516 genotypes we should select as core individuals. Hence, it is necessary to take a random sample of population.  
517 Here we extended the APY to plants. Since the APY does not provide information on which genotypes should be  
518 included in the core population, another algorithm was used to efficiently select these individuals. We used the  
519 genetic optimization algorithm in the selection of sub-populations, the LA-GA-T (look ahead genetic algorithm  
520 with taboo) proposed by Akdemir (2017) in his STPGA (selection of training populations by genetic algorithms)  
521 R package. Genetic algorithms work based on the principles of biological evolution, so that they solve their  
522 problems using evolutionary strategies, where at each iteration, the best individuals are selected and elite  
523 individuals and so on form the next population. Still, the term taboo indicates that the solutions recently tested  
524 will be avoided in the next attempts, avoiding unnecessary evaluations, and limiting the number of iterations  
525 necessary to reach convergence. Thus, LA-GA-T optimizes the selection, on a genetic basis, of the  $n$  genotypes  
526 informed by APY to compose our optimized training set (OTS) (Fritsche-Neto et al., 2018). In this context,  
527 Mendonça & Fritsche-Neto (2020) used the algorithm designed by Akdemir (2017) to select the most  
528 representative genotypes to build the training population. Similar to our findings, they did not notice an increase  
529 in PA while using OTS, but reduced the budget.

530         Nevertheless, in the present work, we extended these algorithms to more complex relationship matrices,  
531 as the Kronecker product of the genomic relationship matrix (GRM), with the environmental variances and  
532 covariances matrix (W) and the traits (T) of interest ( $G \otimes E \otimes T$  or  $G \otimes W \otimes T$ ). Although these scenarios cause  
533 a high level of imbalance in the data, they will give an idea about which genotypes need to be phenotyped, in  
534 which locations and for which traits in order to form a smaller but optimized training set, reducing fieldwork and  
535 the financial resources spent on evaluations, and how much data imbalance the models support for the prediction

536 of hybrids, without important losses in PA. Thus, it allowed us to identify which genotypes should be evaluated  
537 in which environments and for which traits, to form a super-optimized training population, capable of predicting  
538 the performance of the entire population for all traits and environments, filling gaps in GS and answering questions  
539 about the optimal partition of genotypes across environments (Jarquin et al., 2020).

540 Voss-Fels et al. (2019) said that the TRN have to be exceptionally large. Similarly, Wang et al. (2018)  
541 stated that the larger the TRN, the better the estimation of genetic effects and therefore, the greater the accuracy,  
542 mainly for low heritability traits. Here, the amount of information for each OTS, regardless of the kernel, is small,  
543 representing between 1.6 and 19.6% of the total available information. Moreover, the samples have a good  
544 distribution of genotypes, including those genotypes that perform well, and those that are not so good, bringing  
545 positive impacts on PA (Michel et al., 2020). As expected and similar to what Pinho Morais et al. (2020) found,  
546 with a small effective population size, PA is diminished, since the sample contains small genetic variability.  
547 However, we still obtained satisfactory prediction values, with an overall mean up to 0.41 and 0.54 for USP and  
548 Helix, respectively, with the advantage that costs were reduced by more than 1000% and the labor with the TRN  
549 was also reduced. According to Krchov and Bernardo (2015), accuracies should be greater than 0.50 so that the  
550 GS is superior and chosen instead of the phenotypic selection.

551 It is interesting to notice that, with a similar increase in effective population size of approximately 90-  
552 100% from OTS 1 to OTS 2, and from OTS 2 to OTS 3, respecting the particularities of each training set  
553 population, the increases in PA are different for each kernel-dataset combination, as given in **Fig. 1**, **Fig. 2** and  
554 **Table 1**, which show that PA practically doubled for GWT when compared to GET, mainly for the USP dataset,  
555 whose amount of information used as TRN represents a very small portion of the total dataset. Therefore, it means  
556 that a small increase in the training population results in satisfactory PA increases, especially when considering  
557 the response to selection. However, GET proved less efficient for optimizing TRN, because it assumes that the  
558 environments are not related, and thus needs more information to explain variations in the whole dataset, while  
559 GWT proved more efficient for optimizing TRN, than using the W matrix for optimization. With all the  
560 aggregated information it carries, GWT is able to select individuals more assertively, and then needs less  
561 information to form the OTS, so the TRN size is smaller, providing the added advantages of lower cost and labor.  
562 Shown here for a complex case, the global idea is similar to what was observed in Costa-Neto et al. (2021a),  
563 adding information to help in prediction.

564 Since the costs of genotyping are decreasing, whereas the costs of field testing in maize are either  
565 stagnant or increasing, and adding that genotypic information is stable, not liable to seasonal variation, less effort  
566 is expended saving money resources, genotypic selection is, from this perspective, more efficient (Krchov &  
567 Bernardo, 2015). It is worth noting that with a fixed budget, as we decrease the training population size, using  
568 OTS for example, we can have a larger test population, since the resources are reallocated from phenotyping to  
569 genotyping, or even, with a fixed training population, small budget increments mean a significant increase in the  
570 test population, which can be considerably expanded for greater selection gains (Riedelsheimer & Melchinger,  
571 2013; Krchov & Bernardo, 2015).

572 Looking to reduce costs with phenotyping, Lado et al. (2018), working with wheat, found that there  
573 were no losses in the predictive power when reducing the training population up to 30% when traits highly  
574 correlated to the trait of interest are used in the multi-trait model because the correlation between the traits and  
575 the heritability of each assists in the prediction of the other. Here, we could reduce the training population up to

576 approximately 4% obtaining satisfactory results when considering the selection gains per 10,000USD invested,  
577 which were about  $0.70 \times 10^{-3}$  against  $0.16 \times 10^{-3}$ , with optimized (GWT) against standard scenario (MTMET  
578 CV2) TRN, respectively, for the HEL dataset and  $1.42 \times 10^{-3}$  against  $0.16 \times 10^{-3}$  for the USP dataset.

579 The genetic gain per dollar invested was estimated as a basis of comparison for responses in different  
580 TRN sizes, datasets and mainly to justify the use of optimization for training populations in GS. From the results,  
581 we can infer that the optimized populations have advantages over the standard scenario (70% TRN-30% TST).  
582 The difference in gains between the datasets is due to their particular characteristics, such as the number of inbred  
583 lines and the PA reached. For the HEL dataset, however, PA was higher, and the costs of genotyping were also  
584 higher, since there were a great number of inbred lines, so gains were lower; there was also an inversion of gains  
585 between GET and GWT, where the efficiency of the GWT kernel remains practically constant while that of GET  
586 falls. For the USP dataset it was the opposite; nevertheless, the PAs were lower, there were fewer individuals to  
587 both genotype and phenotype. In this way, the costs per individual were lower and the gains were higher, and  
588 GWT outperformed GET in all the scenarios. Altogether, GWT allowed reducing the TRN up to 58% compared  
589 with GET. From this point of view, although the PA using GWT is the lowest, independent of the scenario, its  
590 advantage can be offset by the gain in the response to selection per USD invested (see **Fig. 5**); giving special  
591 attention to GWT in the USP dataset. In summary, compared with MTMET – CV2, with GWT there was a  
592 reduction of up to 60% in terms of PA; however, it brings the possibility of substantially reducing the number of  
593 plot:traits to be phenotyped up to 98%. Furthermore, using OTS plus W allows increasing the response to selection  
594 per amount invested up to 142% compared with GET; thus, there is no gain in PA with OTS, but the reduction in  
595 the training population greatly reduces costs and fieldwork, and thus, the relative genetic gains are greater.

596 In light of this, our results add to the subject of training populations, answering questions about which  
597 design to use to distribute the population for evaluation, which individuals to choose to form the training  
598 population, because as already seen, TRN is the key to the success of GS.

599 Multi-trait and multi-environment analyses have been applied as a way to optimize the distribution of  
600 resources through GP, reaching satisfactory accuracy and gains; however, this scenario can still be worked on and  
601 improved, taking advantage of new tools, like the environmental relationship matrix (W matrix) and genetic  
602 algorithms (APY and LA-GA-T) to optimize the allocation of resources. To our knowledge, this is the first work  
603 that tests the optimization of training set populations with genetic algorithms, which determine the size of the  
604 population and select the individuals based on complex kernels, causing a high level of imbalance, and we  
605 observed that, using a smaller optimized training set, we diminished the phenotypic evaluations in the field, and  
606 consequently saved costs that can be reallocated for genotyping. Additionally, we calculated the gains per  
607 10,000USD invested, which allowed us to infer that, in a practical way, by applying optimization and maintaining  
608 a constant selection intensity, under a fixed budget, the input lines/hybrids of a breeding program can be larger, a  
609 greater number of crosses can be tested per cycle and in the early stages, this will improve the gains. The initial  
610 investments in GS are considerably high; however, they are offset by gains per unit of time. Nevertheless, it is  
611 known that that the genetic variance of a given population decreases over the selection cycles, especially in small  
612 populations sizes, which limits the selection gains (Muleta et al., 2019). Hence, we can consider the optimization  
613 aiming to renovate training sets each year, to keep GS accuracy acceptable and raise the gains. Therefore, periodic  
614 recalibration of the training population is important to endorse genetic variability and, in addition, when using an  
615 optimized population for recalibration, the cost of evaluation (genotyping plus phenotyping) is offset by the

616 genetic gains obtained (Muleta et al., 2019). In summary, optimization gave a good balance between gain *versus*  
617 costs, and between gain *versus* labor, and added new insight for using the algorithms tested here.

618 **5. CONCLUSIONS**

619 Genomic prediction models that include  $G \times E$  and  $G \times W$  interaction effects always increase PA,  
620 performing better than main effects models;  $G \times E$  interaction is the best scenario, with a small increase in multi-  
621 trait multi-environment analysis when compared with single-trait multi-environment analysis. Furthermore,  
622 genetic algorithms of optimization associated with genomic and enviromic data are efficient in designing  
623 optimized training sets for genomic prediction and improve genetic gains per dollar invested. However, it is worth  
624 remembering that there is a specific interaction between combinations of germplasm, environments, experimental  
625 network and evaluated traits that must be taken into account when using the proposed approach.

626 **REFERENCES**

- 627 Acosta-Pech, R., Crossa, J., de los Campos, G., Teyssèdre, S., Claustres, B., Pérez-Elizalde, S., & Pérez-  
628 Rodríguez, P. (2017). Genomic models with genotype  $\times$  environment interaction for predicting hybrid  
629 performance: an application in maize hybrids. *Theoretical and Applied Genetics*, *130*(7), 1431–1440.  
630 <https://doi.org/10.1007/s00122-017-2898-0>
- 631 Akdemir, D. (2017). *STPGA: Selection of training populations with a genetic algorithm* (p. 111989).  
632 <https://doi.org/10.1101/111989>
- 633 Akdemir, D., Sanchez, J. I., & Jannink, J. L. (2015). Optimization of genomic selection training populations with  
634 a genetic algorithm. *Genetics Selection Evolution*, *47*(1), 1–10. <https://doi.org/10.1186/s12711-015-0116-6>
- 635 Alves, F. C., Granato, Í. S. C., Galli, G., Lyra, D. H., Fritsche-Neto, R., & De Los Campos, G. (2019). Bayesian  
636 analysis and prediction of hybrid performance. *Plant Methods*, *15*(1), 1–18. [https://doi.org/10.1186/s13007-](https://doi.org/10.1186/s13007-019-0388-x)  
637 [019-0388-x](https://doi.org/10.1186/s13007-019-0388-x)
- 638 Andrade, L. R. B. de, Neto, R. F., Granato, Í. S. C., Sant’Ana, G. C., Morais, P. P. P., & Borém, A. (2016). Genetic  
639 vulnerability and the relationship of commercial germplasms of maize in Brazil with the nested association  
640 mapping parents. *PLoS ONE*, *11*(10), 1–14. <https://doi.org/10.1371/journal.pone.0163739>
- 641 Bandeira e Sousa, M., Cuevas, J., Couto, E. G. de O., Pérez-Rodríguez, P., Jarquín, D., Fritsche-Neto, R.,  
642 Burgueño, J., & Crossa, J. (2017). Genomic-enabled prediction in maize using kernel models with genotype  
643  $\times$  environment interaction. *G3: Genes, Genomes, Genetics*, *7*(6), 1995–2014.  
644 <https://doi.org/10.1534/g3.117.042341>
- 645 Browning, B. L., & Browning, S. R. (2008). A unified approach to genotype imputation and haplotype-phase  
646 inference for large data sets of trios and unrelated individuals. *American Journal of Human Genetics*, *84*(2),  
647 210–223. <https://doi.org/10.1016/j.ajhg.2009.01.005>
- 648 Burgueño, J., de los Campos, G., Weigel, K., & Crossa, J. (2012). Genomic prediction of breeding values when  
649 modeling genotype  $\times$  environment interaction using pedigree and dense molecular markers. *Crop Science*,  
650 *52*(2), 707–719. <https://doi.org/10.2135/cropsci2011.06.0299>
- 651 Butler, A. D. (2018). *Package ‘asreml.’*
- 652 Carvalho, H. F., Galli, G., Ventrone Ferrão, L. F., Vieira Almeida Nonato, J., Padilha, L., Perez Maluf, M., Ribeiro  
653 de Resende, M. F., Guerreiro Filho, O., & Fritsche-Neto, R. (2020). The effect of bienniality on genomic  
654 prediction of yield in arabica coffee. *Euphytica*, *216*(6). <https://doi.org/10.1007/s10681-020-02641-7>
- 655 Chen, Q., Song, J., Du, W. P., Xu, L. Y., Jiang, Y., Zhang, J., Xiang, X. L., & Yu, G. R. (2018). Identification  
656 and genetic mapping for *rht-DM*, a dominant dwarfing gene in mutant semi-dwarf maize using QTL-seq  
657 approach. *Genes and Genomics*, *40*(10), 1091–1099. <https://doi.org/10.1007/s13258-018-0716-y>
- 658 Contini, E., Mota, M. M., Marra, R., Borghi, E., Miranda, R. A. de, Silva, A. F. da, Silva, D. D. da, Machado, J.  
659 R. de A., Cota, L. V., Costa, R. V. da, & Mendes, S. M. (2019). Milho-Characterização e Desafios  
660 Tecnológicos. *Embrapa*, *5*(1), 1–45.
- 661 Costa-Neto, G., Fritsche-Neto, R., & Crossa, J. (2021). Nonlinear kernels, dominance, and envirotyping data  
662 increase the accuracy of genome-based prediction in multi-environment trials. *Heredity*, *126*(1), 92–106.  
663 <https://doi.org/10.1038/s41437-020-00353-1>
- 664 Costa-Neto, G., Galli, G., Carvalho, H. F., Crossa, J., & Fritsche-Neto, R. (2021). *EnvRtype*: a software to



- 665 interplay enviromics and quantitative genomics in agriculture . *G3 Genes|Genomes|Genetics*.  
666 <https://doi.org/10.1093/g3journal/jkab040>
- 667 Crossa, J., Pérez-Rodríguez, P., Cuevas, J., Montesinos-López, O., Jarquín, D., de los Campos, G., Burgueño, J.,  
668 González-Camacho, J. M., Pérez-Elizalde, S., Beyene, Y., Dreisigacker, S., Singh, R., Zhang, X., Gowda,  
669 M., Roorkiwal, M., Rutkoski, J., & Varshney, R. K. (2017). Genomic Selection in Plant Breeding: Methods,  
670 Models, and Perspectives. *Trends in Plant Science*, 22(11), 961–975.  
671 <https://doi.org/10.1016/j.tplants.2017.08.011>
- 672 de Oliveira, A. A., Resende, M. F. R., Ferrão, L. F. V., Amadeu, R. R., Guimarães, L. J. M., Guimarães, C. T.,  
673 Pastina, M. M., & Margarido, G. R. A. (2020). Genomic prediction applied to multiple traits and  
674 environments in second season maize hybrids. *Heredity*, 125(1–2), 60–72. [https://doi.org/10.1038/s41437-](https://doi.org/10.1038/s41437-020-0321-0)  
675 [020-0321-0](https://doi.org/10.1038/s41437-020-0321-0)
- 676 Dias, K. O. D. G., Gezan, S. A., Guimarães, C. T., Nazarian, A., Da Costa E Silva, L., Parentoni, S. N., De Oliveira  
677 Guimarães, P. E., De Oliveira Anoni, C., Pádua, J. M. V., De Oliveira Pinto, M., Noda, R. W., Ribeiro, C.  
678 A. G., De Magalhães, J. V., Garcia, A. A. F., De Souza, J. C., Guimarães, L. J. M., & Pastina, M. M. (2018).  
679 Improving accuracies of genomic predictions for drought tolerance in maize by joint modeling of additive  
680 and dominance effects in multi-environment trials. *Heredity*, 121(1), 24–37.  
681 <https://doi.org/10.1038/s41437-018-0053-6>
- 682 Frischie-Neto, R., Akdemir, D., & Jannink, J. L. (2018). Accuracy of genomic selection to predict maize single-  
683 crosses obtained through different mating designs. *Theoretical and Applied Genetics*, 131(5), 1153–1162.  
684 <https://doi.org/10.1007/s00122-018-3068-8>
- 685 Guo, J., Pradhan, S., Shahi, D., Khan, J., Mcbreen, J., Bai, G., Murphy, J. P., & Babar, M. A. (2020). Increased  
686 Prediction Accuracy Using Combined Genomic Information and Physiological Traits in A Soft Wheat Panel  
687 Evaluated in Multi-Environments. *Scientific Reports*, 10(1), 1–12. [https://doi.org/10.1038/s41598-020-](https://doi.org/10.1038/s41598-020-63919-3)  
688 [63919-3](https://doi.org/10.1038/s41598-020-63919-3)
- 689 Ibba, M. I., Crossa, J., Montesinos-López, O. A., Montesinos-López, A., Juliana, P., Guzman, C., Delorean, E.,  
690 Dreisigacker, S., & Poland, J. (2020). Genome-based prediction of multiple wheat quality traits in multiple  
691 years. *Plant Genome*, 13(3). <https://doi.org/10.1002/tpg2.20034>
- 692 Isidro, J., Jannink, J. L., Akdemir, D., Poland, J., Heslot, N., & Sorrells, M. E. (2015). Training set optimization  
693 under population structure in genomic selection. *TAG. Theoretical and Applied Genetics. Theoretische Und*  
694 *Angewandte Genetik*, 128(1), 145–158. <https://doi.org/10.1007/s00122-014-2418-4>
- 695 Jannink, J. L., Lorenz, A. J., & Iwata, H. (2010). Genomic selection in plant breeding: From theory to practice.  
696 *Briefings in Functional Genomics and Proteomics*, 9(2), 166–177. <https://doi.org/10.1093/bfpg/elq001>
- 697 Jarquín, D., Crossa, J., Lacaze, X., Du Cheyron, P., Daucourt, J., Lorgeou, J., Piraux, F., Guerreiro, L., Pérez, P.,  
698 Calus, M., Burgueño, J., & de los Campos, G. (2014). A reaction norm model for genomic selection using  
699 high-dimensional genomic and environmental data. *Theoretical and Applied Genetics*, 127(3), 595–607.  
700 <https://doi.org/10.1007/s00122-013-2243-1>
- 701 Jarquin, D., Howard, R., Crossa, J., Beyene, Y., Gowda, M., Martini, J. W. R., Pazaran, G. C., Burgueño, J.,  
702 Pacheco, A., Grondona, M., Wimmer, V., & Prasanna, B. M. (2020). Genomic prediction enhanced sparse  
703 testing for multi-environment trials. *G3: Genes, Genomes, Genetics*, 10(8), 2725–2739.  
704 <https://doi.org/10.1534/g3.120.401349>

- 705 Jarquin, D., Leon, N. De, Romay, C., Bohn, M., & Buckler, E. S. (2021). *Utility of Climatic Information via*  
706 *Combining Ability Models to Improve Genomic Prediction for Yield Within the Genomes to Fields Maize*  
707 *Project. 11*(March), 1–11. <https://doi.org/10.3389/fgene.2020.592769>
- 708 Jia, Y., & Jannink, J. L. (2012). Multiple-trait genomic selection methods increase genetic value prediction  
709 accuracy. *Genetics*, *192*(4), 1513–1522. <https://doi.org/10.1534/genetics.112.144246>
- 710 Krchov, L. M., & Bernardo, R. (2015). Relative efficiency of genomewide selection for testcross performance of  
711 doubled haploid lines in a maize breeding program. *Crop Science*, *55*(5), 2091–2099.  
712 <https://doi.org/10.2135/cropsci2015.01.0064>
- 713 Lado, B., Vázquez, D., Quincke, M., Silva, P., Aguilar, I., & Gutiérrez, L. (2018). Resource allocation  
714 optimization with multi-trait genomic prediction for bread wheat (*Triticum aestivum* L.) baking quality.  
715 *Theoretical and Applied Genetics*, *131*(12), 2719–2731. <https://doi.org/10.1007/s00122-018-3186-3>
- 716 Lopez-Cruz, M., Crossa, J., Bonnett, D., Dreisigacker, S., Poland, J., Jannink, J. L., Singh, R. P., Autrique, E., &  
717 de los Campos, G. (2015). Increased prediction accuracy in wheat breeding trials using a marker ×  
718 environment interaction genomic selection model. *G3: Genes, Genomes, Genetics*, *5*(4), 569–582.  
719 <https://doi.org/10.1534/g3.114.016097>
- 720 Lush, J.L. (1937). *Animal Breeding Plans*. Collegiate Press, Inc., Ames.
- 721 Lyra, D. H., de Freitas Mendonça, L., Galli, G., Alves, F. C., Granato, Í. S. C., & Fritsche-Neto, R. (2017). Multi-  
722 trait genomic prediction for nitrogen response indices in tropical maize hybrids. *Molecular Breeding*, *37*(6).  
723 <https://doi.org/10.1007/s11032-017-0681-1>
- 724 Matias, F. I., Alves, F. C., Meireles, K. G. X., Barrios, S. C. L., do Valle, C. B., Endelman, J. B., & Fritsche-Neto,  
725 R. (2019). On the accuracy of genomic prediction models considering multi-trait and allele dosage in  
726 *Urochloa* spp. interspecific tetraploid hybrids. *Molecular Breeding*, *39*(7). [https://doi.org/10.1007/s11032-](https://doi.org/10.1007/s11032-019-1002-7)  
727 [019-1002-7](https://doi.org/10.1007/s11032-019-1002-7)
- 728 Mendonça, L. de F., & Fritsche-Neto, R. (2020). The accuracy of different strategies for building training sets for  
729 genomic predictions in segregating soybean populations. *Crop Science*, *60*(6), 3115–3126.  
730 <https://doi.org/10.1002/csc2.20267>
- 731 Meuwissen, T. H. E., Hayes, B. J., & Goddard, M. E. (2001). Prediction of total genetic value using genome-wide  
732 dense marker maps. *Genetics*, *157*(4), 1819–1829. <https://doi.org/10.1093/genetics/157.4.1819>
- 733 Michel, S., Löschenberger, F., Sperry, E., Ametz, C., & Bürstmayr, H. (2020). Mitigating the impact of selective  
734 phenotyping in training populations on the prediction ability by multi-trait pedigree and genomic selection  
735 models. *Plant Breeding*, *139*(6), 1067–1075. <https://doi.org/10.1111/pbr.12862>
- 736 Misztal, I., Legarra, A., & Aguilar, I. (2014). Using recursion to compute the inverse of the genomic relationship  
737 matrix. *Journal of Dairy Science*, *97*(6), 3943–3952. <https://doi.org/10.3168/jds.2013-7752>
- 738 Misztal, Ignacy. (2016). Inexpensive computation of the inverse of the genomic relationship matrix in populations  
739 with small effective population size. *Genetics*, *202*(2), 401–409.  
740 <https://doi.org/10.1534/genetics.115.182089>
- 741 Montesinos-López, O. A., Montesinos-López, A., Crossa, J., Toledo, F. H., Pérez-Hernández, O., Eskridge, K.  
742 M., & Rutkoski, J. (2016). A genomic bayesian multi-trait and multi-environment model. *G3: Genes,*  
743 *Genomes, Genetics*, *6*(9), 2725–2774. <https://doi.org/10.1534/g3.116.032359>
- 744 Montesinos-López, O. A., Montesinos-López, A., Tuberosa, R., Maccaferri, M., Sciara, G., Ammar, K., & Crossa,

- 745 J. (2019). Multi-Trait, Multi-Environment Genomic Prediction of Durum Wheat With Genomic Best Linear  
746 Unbiased Predictor and Deep Learning Methods. *Frontiers in Plant Science*, *10*(November), 1–12.  
747 <https://doi.org/10.3389/fpls.2019.01311>
- 748 Muleta, K. T., Pressoir, G., & Morris, G. P. (2019). Optimizing genomic selection for a sorghum breeding program  
749 in Haiti: A simulation study. *G3: Genes, Genomes, Genetics*, *9*(2), 391–401.  
750 <https://doi.org/10.1534/g3.118.200932>
- 751 Oakey, H., Cullis, B., Thompson, R., Comadran, J., Halpin, C., & Waugh, R. (2016). Genomic selection in multi-  
752 environment crop trials. *G3: Genes, Genomes, Genetics*, *6*(5), 1313–1326.  
753 <https://doi.org/10.1534/g3.116.027524>
- 754 Pérez, P., & de los Campos, G. (2014). BGLR: A Statistical Package for Whole Genome Regression and  
755 Prediction. *Genetics*, *198*(2), 483–495.
- 756 Pérez, P., & De Los Campos, G. (2014). Genome-wide regression and prediction with the BGLR statistical  
757 package. *Genetics*, *198*(2), 483–495. <https://doi.org/10.1534/genetics.114.164442>
- 758 Pinho Morais, P. P., Akdemir, D., Braatz de Andrade, L. R., Jannink, J. L., Fritsche-Neto, R., Borém, A., Couto  
759 Alves, F., Hottis Lyra, D., & Granato, Í. S. C. (2020). Using public databases for genomic prediction of  
760 tropical maize lines. *Plant Breeding*, *139*(4), 697–707. <https://doi.org/10.1111/pbr.12827>
- 761 R Core Team (2020). R: A language and environment for statistical computing. R Foundation for Statistical  
762 Computing, Vienna, Austria. URL <https://www.R-project.org/>.
- 763 Riedelsheimer, C., & Melchinger, A. E. (2013). Optimizing the allocation of resources for genomic selection in  
764 one breeding cycle. *Theoretical and Applied Genetics*, *126*(11), 2835–2848.  
765 <https://doi.org/10.1007/s00122-013-2175-9>
- 766 Robert, P., Gouis, J. Le, Consortium, T. B., & Rincent, R. (2020). *Combining Crop Growth Modeling With Trait-*  
767 *Assisted Prediction Improved the Prediction of Genotype by Environment Interactions*. *11*(June), 1–11.  
768 <https://doi.org/10.3389/fpls.2020.00827>
- 769 Rutkoski, J., Benson, J., Jia, Y., Brown-Guedira, G., Jannink, J.-L., & Sorrells, M. (2012). Evaluation of Genomic  
770 Prediction Methods for Fusarium Head Blight Resistance in Wheat. *The Plant Genome*, *5*(2), 51–61.  
771 <https://doi.org/10.3835/plantgenome2012.02.0001>
- 772 Schrag, T. A., Möhring, J., Maurer, H. P., Dhillon, B. S., Melchinger, A. E., Piepho, H. P., Sørensen, A. P., &  
773 Frisch, M. (2009). Molecular marker-based prediction of hybrid performance in maize using unbalanced  
774 data from multiple experiments with factorial crosses. *Theoretical and Applied Genetics*, *118*(4), 741–751.  
775 <https://doi.org/10.1007/s00122-008-0934-9>
- 776 Shull, G. H. (1908). The Composition of a Field of Maize, *Journal of Heredity*, Volume os-4, Issue 1, January  
777 1908, Pages 296–301, <https://doi.org/10.1093/jhered/os-4.1.296>
- 778 Schulthess, A. W., Zhao, Y., Longin, C. F. H., & Reif, J. C. (2018). Advantages and limitations of multiple-trait  
779 genomic prediction for Fusarium head blight severity in hybrid wheat (*Triticum aestivum* L.). *Theoretical*  
780 *and Applied Genetics*, *131*(3), 685–701. <https://doi.org/10.1007/s00122-017-3029-7>
- 781 Technow, F., Schrag, T. A., Schipprack, W., Bauer, E., Simianer, H., & Melchinger, A. E. (2014). Genome  
782 properties and prospects of genomic prediction of hybrid performance in a breeding program of maize.  
783 *Genetics*, *197*(4), 1343–1355. <https://doi.org/10.1534/genetics.114.165860>
- 784 Unterseer, S., Bauer, E., Haberer, G., Seidel, M., Knaak, C., Ouzunova, M., Meitinger, T., Strom, T. M., Fries,

- 785 R., Pausch, H., Bertani, C., Davassi, A., Mayer, K. F. X., & Schön, C. C. (2014). A powerful tool for genome  
786 analysis in maize: Development and evaluation of the high density 600 k SNP genotyping array. *BMC*  
787 *Genomics*, *15*(1), 1–15. <https://doi.org/10.1186/1471-2164-15-823>
- 788 VanRaden, P. M. (2008). Efficient methods to compute genomic predictions. *Journal of Dairy Science*, *91*(11),  
789 4414–4423. <https://doi.org/10.3168/jds.2007-0980>
- 790 Voss-Fels, K. P., Cooper, M., & Hayes, B. J. (2019). Accelerating crop genetic gains with genomic selection.  
791 *Theoretical and Applied Genetics*, *132*(3), 669–686. <https://doi.org/10.1007/s00122-018-3270-8>
- 792 Wang, X., Xu, Y., Hu, Z., & Xu, C. (2018). Genomic selection methods for crop improvement: Current status and  
793 prospects. *Crop Journal*, *6*(4), 330–340. <https://doi.org/10.1016/j.cj.2018.03.001>
- 794 Werner, C. R., Gaynor, R. C., Gorjanc, G., Hickey, J. M., Kox, T., Abbadi, A., Leckband, G., Snowdon, R. J., &  
795 Stahl, A. (2020). How Population Structure Impacts Genomic Selection Accuracy in Cross-Validation:  
796 Implications for Practical Breeding. *Frontiers in Plant Science*, *11*(December), 1–14.  
797 <https://doi.org/10.3389/fpls.2020.592977>
- 798 Wimmer, V., Albrecht, T., Auinger, H. J., & Schön, C. C. (2012). Synbreed: A framework for the analysis of  
799 genomic prediction data using R. *Bioinformatics*, *28*(15), 2086–2087.  
800 <https://doi.org/10.1093/bioinformatics/bts335>
- 801 Zheng, X., Levine, D., Shen, J., Gogarten, S. M., Laurie, C., & Weir, B. S. (2012). A high-performance computing  
802 toolset for relatedness and principal component analysis of SNP data. *Bioinformatics*, *28*(24), 3326–3328.  
803 <https://doi.org/10.1093/bioinformatics/bts606>  
804
